# Supplementary material for: A low-temperature solution route for the synthesis of single crystals of BaSe3 and its photovoltaic study
Source: Royal Society of Chemistry journal article supplement (doi:10.1039/d4nj03041a), 2024-01-01
Supplement: d4nj03041a1.pdf [file d4nj03041a1.pdf]

## Low-temperature solution route for the synthesis of single crystals of $\text{BaSe}_3$ and its photovoltaic study

Komal Srivastava, Akshay K. Ray, Sweta Yadav, Melepurath Deepa, and Jai Prakash\*

*Department of Chemistry, Indian Institute of Technology Hyderabad, Kandi, Sangareddy, Telangana 502284, India*

\*Corresponding author: jaiprakash@chy.iith.ac.in

### Electronic Supplementary Information (ESI)

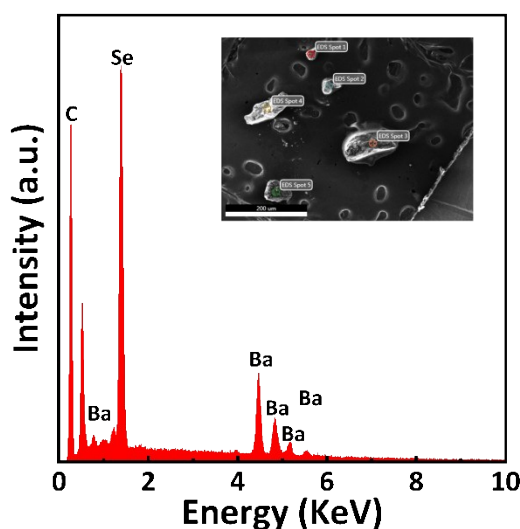

**Fig. S11:** The EDX spectrum of a  $\text{BaSe}_3$  crystal. The inset shows an FE-SEM image of a few  $\text{BaSe}_3$  crystals. These data were collected with the help of a field emission scanning electron microscope equipped with an octane elite (EDX Inc, USA) spectrometer.

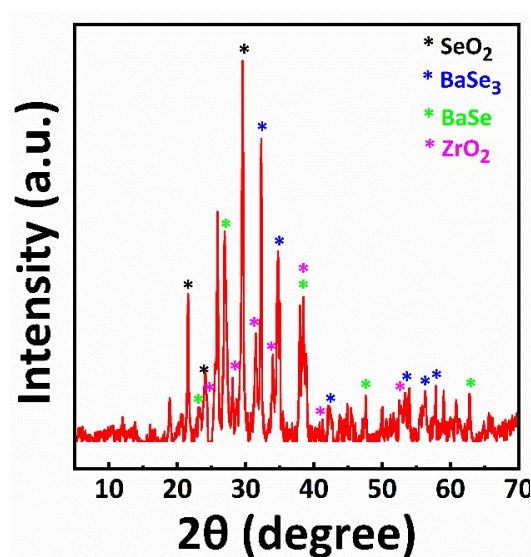

**Fig. S12:** The PXR D pattern of the precipitate left after dissolving  $\text{Ba}_8\text{Zr}_2\text{Se}_{11}(\text{Se}_2)$  in water.

**Table SI1:** The atomic displacement parameters ( $\text{\AA}^2$ ) for the  $\text{BaSe}_3$  structure.

|     | $U^{11}$     | $U^{22}$     | $U^{33}$   | $U^{12}$     | $U^{13}$      | $U^{23}$      |
|-----|--------------|--------------|------------|--------------|---------------|---------------|
| Ba1 | 0.01483 (15) | 0.01483 (15) | 0.0123 (2) | 0.000        | 0.000         | 0.000         |
| Se1 | 0.01116 (16) | 0.01116 (16) | 0.0178 (3) | 0.00006 (19) | -0.00055 (17) | -0.00055 (17) |
| Se2 | 0.0121 (2)   | 0.0121 (2)   | 0.0160 (4) | -0.0004 (3)  | 0.000         | 0.000         |

**Table SI2:** The bond angles for the  $\text{BaSe}_3$  structure.

|                                             |              |                                            |              |
|---------------------------------------------|--------------|--------------------------------------------|--------------|
| Se1 <sup>i</sup> –Ba1–Se1 <sup>ii</sup>     | 112.101 (9)  | Se1 <sup>ii</sup> –Ba1–Se2 <sup>ix</sup>   | 122.062 (10) |
| Se1 <sup>i</sup> –Ba1–Se1 <sup>iii</sup>    | 104.332 (17) | Se1 <sup>iii</sup> –Ba1–Se2 <sup>ix</sup>  | 38.860 (12)  |
| Se1 <sup>ii</sup> –Ba1–Se1 <sup>iii</sup>   | 112.101 (9)  | Se1 <sup>iv</sup> –Ba1–Se2 <sup>ix</sup>   | 73.282 (12)  |
| Se1 <sup>i</sup> –Ba1–Se1 <sup>iv</sup>     | 112.101 (9)  | Se1 <sup>v</sup> –Ba1–Se2 <sup>ix</sup>    | 59.117 (13)  |
| Se1 <sup>ii</sup> –Ba1–Se1 <sup>iv</sup>    | 104.332 (17) | Se1 <sup>vi</sup> –Ba1–Se2 <sup>ix</sup>   | 58.315 (11)  |
| Se1 <sup>iii</sup> –Ba1–Se1 <sup>iv</sup>   | 112.101 (9)  | Se1 <sup>vii</sup> –Ba1–Se2 <sup>ix</sup>  | 140.052 (13) |
| Se1 <sup>i</sup> –Ba1–Se1 <sup>v</sup>      | 178.116 (16) | Se1 <sup>viii</sup> –Ba1–Se2 <sup>ix</sup> | 105.778 (11) |
| Se1 <sup>ii</sup> –Ba1–Se1 <sup>v</sup>     | 66.924 (3)   | Se2 <sup>i</sup> –Ba1–Se2 <sup>ix</sup>    | 157.13 (2)   |
| Se1 <sup>iii</sup> –Ba1–Se1 <sup>v</sup>    | 77.552 (5)   | Se2–Ba1–Se2 <sup>ix</sup>                  | 92.252 (4)   |
| Se1 <sup>iv</sup> –Ba1–Se1 <sup>v</sup>     | 66.924 (3)   | Se1 <sup>i</sup> –Ba1–Se2 <sup>iv</sup>    | 73.282 (12)  |
| Se1 <sup>i</sup> –Ba1–Se1 <sup>vi</sup>     | 66.924 (3)   | Se1 <sup>ii</sup> –Ba1–Se2 <sup>iv</sup>   | 122.378 (13) |
| Se1 <sup>ii</sup> –Ba1–Se1 <sup>vi</sup>    | 178.116 (16) | Se1 <sup>iii</sup> –Ba1–Se2 <sup>iv</sup>  | 122.062 (11) |
| Se1 <sup>iii</sup> –Ba1–Se1 <sup>vi</sup>   | 66.924 (3)   | Se1 <sup>iv</sup> –Ba1–Se2 <sup>iv</sup>   | 38.860 (12)  |
| Se1 <sup>iv</sup> –Ba1–Se1 <sup>vi</sup>    | 77.552 (5)   | Se1 <sup>v</sup> –Ba1–Se2 <sup>iv</sup>    | 105.778 (12) |
| Se1 <sup>v</sup> –Ba1–Se1 <sup>vi</sup>     | 114.100 (9)  | Se1 <sup>vi</sup> –Ba1–Se2 <sup>iv</sup>   | 59.117 (13)  |
| Se1 <sup>i</sup> –Ba1–Se1 <sup>vii</sup>    | 77.552 (5)   | Se1 <sup>vii</sup> –Ba1–Se2 <sup>iv</sup>  | 58.315 (11)  |
| Se1 <sup>ii</sup> –Ba1–Se1 <sup>vii</sup>   | 66.924 (3)   | Se1 <sup>viii</sup> –Ba1–Se2 <sup>iv</sup> | 140.052 (13) |
| Se1 <sup>iii</sup> –Ba1–Se1 <sup>vii</sup>  | 178.116 (16) | Se2 <sup>i</sup> –Ba1–Se2 <sup>iv</sup>    | 92.252 (4)   |
| Se1 <sup>iv</sup> –Ba1–Se1 <sup>vii</sup>   | 66.924 (3)   | Se2–Ba1–Se2 <sup>iv</sup>                  | 157.13 (2)   |
| Se1 <sup>v</sup> –Ba1–Se1 <sup>vii</sup>    | 100.564 (16) | Se2 <sup>ix</sup> –Ba1–Se2 <sup>iv</sup>   | 92.252 (4)   |
| Se1 <sup>vi</sup> –Ba1–Se1 <sup>vii</sup>   | 114.100 (9)  | Se2–Se1–Ba1 <sup>x</sup>                   | 78.974 (16)  |
| Se1 <sup>i</sup> –Ba1–Se1 <sup>viii</sup>   | 66.924 (3)   | Se2–Se1–Ba1 <sup>xi</sup>                  | 78.974 (16)  |
| Se1 <sup>ii</sup> –Ba1–Se1 <sup>viii</sup>  | 77.552 (5)   | Ba1 <sup>x</sup> –Se1–Ba1 <sup>xi</sup>    | 100.579 (16) |
| Se1 <sup>iii</sup> –Ba1–Se1 <sup>viii</sup> | 66.924 (3)   | Se2–Se1–Ba1 <sup>xii</sup>                 | 119.948 (13) |
| Se1 <sup>iv</sup> –Ba1–Se1 <sup>viii</sup>  | 178.116 (16) | Ba1 <sup>x</sup> –Se1–Ba1 <sup>xii</sup>   | 77.552 (5)   |
| Se1 <sup>v</sup> –Ba1–Se1 <sup>viii</sup>   | 114.100 (9)  | Ba1 <sup>xi</sup> –Se1–Ba1 <sup>xii</sup>  | 159.584 (17) |
| Se1 <sup>vi</sup> –Ba1–Se1 <sup>viii</sup>  | 100.564 (16) | Se2–Se1–Ba1 <sup>xiii</sup>                | 119.948 (13) |

|                                             |              |                                             |              |
|---------------------------------------------|--------------|---------------------------------------------|--------------|
| Se1 <sup>vii</sup> –Ba1–Se1 <sup>viii</sup> | 114.100 (9)  | Ba1 <sup>x</sup> –Se1–Ba1 <sup>xiii</sup>   | 159.584 (17) |
| Se1 <sup>i</sup> –Ba1–Se2 <sup>i</sup>      | 38.860 (12)  | Ba1 <sup>xi</sup> –Se1–Ba1 <sup>xiii</sup>  | 77.552 (5)   |
| Se1 <sup>ii</sup> –Ba1–Se2 <sup>i</sup>     | 73.282 (12)  | Ba1 <sup>xii</sup> –Se1–Ba1 <sup>xiii</sup> | 97.048 (16)  |
| Se1 <sup>iii</sup> –Ba1–Se2 <sup>i</sup>    | 122.378 (13) | Se1–Se2–Se1 <sup>ii</sup>                   | 112.66 (4)   |
| Se1 <sup>iv</sup> –Ba1–Se2 <sup>i</sup>     | 122.062 (11) | Se1–Se2–Ba1                                 | 133.370 (12) |
| Se1 <sup>v</sup> –Ba1–Se2 <sup>i</sup>      | 140.052 (13) | Se1 <sup>ii</sup> –Se2–Ba1                  | 62.166 (9)   |
| Se1 <sup>vi</sup> –Ba1–Se2 <sup>i</sup>     | 105.778 (11) | Se1–Se2–Ba1 <sup>xiv</sup>                  | 133.370 (12) |
| Se1 <sup>vii</sup> –Ba1–Se2 <sup>i</sup>    | 59.117 (13)  | Se1 <sup>ii</sup> –Se2–Ba1 <sup>xiv</sup>   | 62.166 (9)   |
| Se1 <sup>viii</sup> –Ba1–Se2 <sup>i</sup>   | 58.315 (11)  | Ba1–Se2–Ba1 <sup>xiv</sup>                  | 87.748 (4)   |
| Se1 <sup>i</sup> –Ba1–Se2                   | 122.062 (10) | Se1–Se2–Ba1 <sup>xi</sup>                   | 62.167 (9)   |
| Se1 <sup>ii</sup> –Ba1–Se2                  | 38.860 (12)  | Se1 <sup>ii</sup> –Se2–Ba1 <sup>xi</sup>    | 133.370 (12) |
| Se1 <sup>iii</sup> –Ba1–Se2                 | 73.282 (12)  | Ba1–Se2–Ba1 <sup>xi</sup>                   | 157.13 (2)   |
| Se1 <sup>iv</sup> –Ba1–Se2                  | 122.378 (13) | Ba1 <sup>xiv</sup> –Se2–Ba1 <sup>xi</sup>   | 87.748 (4)   |
| Se1 <sup>v</sup> –Ba1–Se2                   | 58.315 (11)  | Se1–Se2–Ba1 <sup>x</sup>                    | 62.167 (9)   |
| Se1 <sup>vi</sup> –Ba1–Se2                  | 140.052 (13) | Se1 <sup>ii</sup> –Se2–Ba1 <sup>x</sup>     | 133.370 (12) |
| Se1 <sup>vii</sup> –Ba1–Se2                 | 105.778 (11) | Ba1–Se2–Ba1 <sup>x</sup>                    | 87.748 (4)   |
| Se1 <sup>viii</sup> –Ba1–Se2                | 59.117 (13)  | Ba1 <sup>xiv</sup> –Se2–Ba1 <sup>x</sup>    | 157.13 (2)   |
| Se2 <sup>i</sup> –Ba1–Se2                   | 92.252 (4)   | Ba1 <sup>xi</sup> –Se2–Ba1 <sup>x</sup>     | 87.748 (4)   |
| Se1 <sup>i</sup> –Ba1–Se2 <sup>ix</sup>     | 122.378 (13) |                                             |              |

Symmetry codes: (i)  $y-1, -x, -z$ ; (ii)  $-x, -y+1, z$ ; (iii)  $-y+1, x, -z$ ; (iv)  $x, y-1, z$ ; (v)  $-y+1, x, -z+1$ ; (vi)  $x, y-1, z-1$ ; (vii)  $y-1, -x, -z+1$ ; (viii)  $-x, -y+1, z-1$ ; (ix)  $y, -x, -z$ ; (x)  $x+1/2, -y+1/2, -z$ ; (xi)  $x, y+1, z$ ; (xii)  $x+1/2, -y+1/2, -z+1$ ; (xiii)  $x, y+1, z+1$ ; (xiv)  $x-1/2, -y+1/2, -z$ .
